# Supplementary material for: An adaptive two-stage analog/regression model for probabilistic prediction of local precipitation in France
Source: Copernicus journal article supplement (doi:10.5194/hess-2017-62), 2017-02-15
Supplement: Supplementary file [file hess-2017-62-AC1-supplement.pdf]

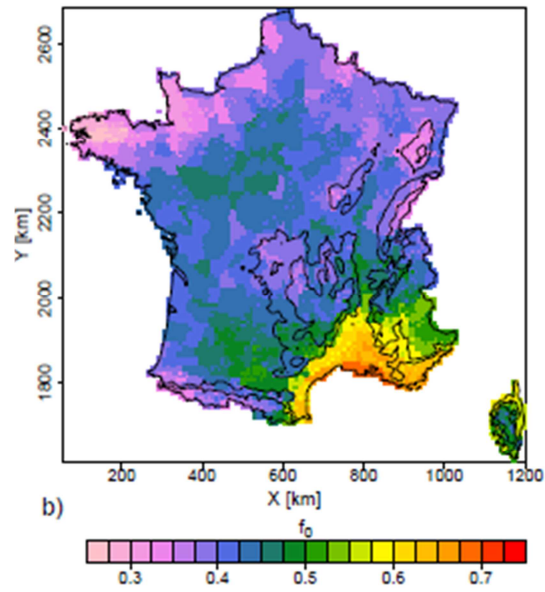

Figure R1a : Probability of a dry days over the 1982-2001 period (percentage of days which are dry).

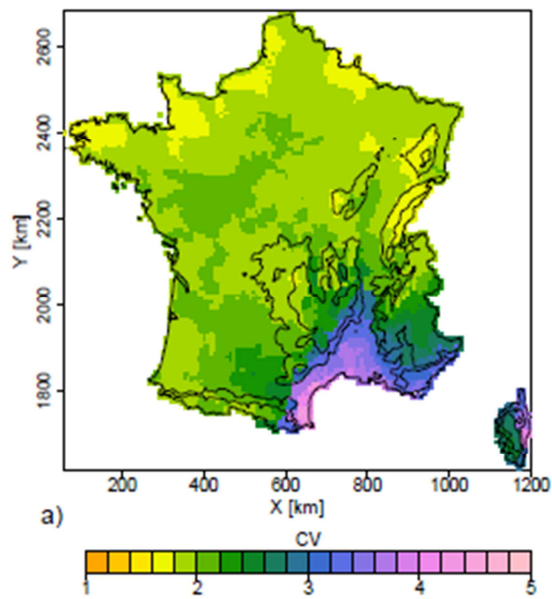

Figure R1b. Variation coefficient of daily precipitation
